# Supplementary material for: Expansion of memory Vδ2 T cells following SARS-CoV-2 vaccination revealed by temporal single-cell transcriptomics
Source: PubMed Central journal article supplement (PMC10954735; doi:10.1038/s41541-024-00853-9), 2024-03-20
Supplement: 41541_2024_853_MOESM1_ESM.pdf [file 41541_2024_853_MOESM1_ESM.pdf]

## SUPPLEMENTAL INFORMATION

---

### **Expansion of memory V $\delta$ 2 T cells following SARS-CoV-2 vaccination revealed by temporal single-cell transcriptomics**

*Sara Terzoli<sup>1,2</sup>, Paolo Marzano<sup>3</sup>, Valentina Cazzetta<sup>1,3</sup>, Rocco Piazza<sup>4</sup>, Inga Sandrock<sup>5</sup>, Sarina Ravens<sup>5</sup>, Likai Tan<sup>6</sup>, Immo Prinz<sup>5,6</sup>, Simone Balin<sup>3</sup>, Michela Calvi<sup>1,3</sup>, Anna Carletti<sup>3</sup>, Assunta Cancellara<sup>1,3</sup>, Nicolò Coianiz<sup>1</sup>, Sara Franzese<sup>1,3</sup>, Alessandro Frigo<sup>1,3</sup>, Antonio Voza<sup>2,7</sup>, Francesca Calcaterra<sup>1,3</sup>, Clara Di Vito<sup>1</sup>, Silvia Della Bella<sup>1,3</sup>, Joanna Mikulak<sup>1#\*</sup> and Domenico Mavilio<sup>1,3#\*</sup>*

*#Shared last authorship; \*Corresponding authors*

<sup>1</sup>Laboratory of Clinical and Experimental Immunology, IRCCS Humanitas Research Hospital, Rozzano, Milan, Italy;

<sup>2</sup>Department of Biomedical Sciences, Humanitas University, Pieve Emanuele, Milan, Italy;

<sup>3</sup>Department of Medical Biotechnology and Translational Medicine, University of Milan, Milan, Italy;

<sup>4</sup>Department of Medicine and Surgery, University of Milan-Bicocca, Monza, Italy;

<sup>5</sup>Institute of Immunology, Hannover Medical School (MHH), Hannover, Germany;

<sup>6</sup>Institute of Systems Immunology, Hamburg Center for Translational Immunology (HCTI), University Medical Center Hamburg-Eppendorf, Hamburg, Germany;

<sup>7</sup>Department of Biomedical Unit, IRCCS Humanitas Research Hospital, Rozzano, Milan, Italy.



## **LIST OF CONTENTS**

Our study is supported by supplemental information that include:

**Page 4-5:** Supplemental Figure 1. scRNA-seq analysis in the SARS-CoV-2 vaccinated subjects (related to Figure 1)

**Page 6-7:** Supplemental Figure 2. Identity of the specific  $\gamma\delta$  T cell cluster activation following SARS-CoV-2 vaccination (related to Figure 2)

**Page 8-9:** Supplemental Figure 3. SARS-CoV-2 vaccination shapes the effectorness of V $\delta$ 2 T cells (related to Figure 3)

**Page 10-11:** Supplemental Figure 4. Specific cluster profiling of  $\gamma\delta$  TCR repertoire (related to Figure 5)

**Page 12:** Supplemental Figure 5. Analysis of the public  $\gamma\delta$  TCR clonotypes (related to Figure 6)

**Page 13-14:** Supplemental Figure 6. Analysis of the expanded  $\gamma\delta$  TCR clones upon SARS-CoV-2 vaccination (related to Figure 7)

**Page 15-16:** Supplemental Figure 7. Increased effector response of V $\delta$ 2 T cells following repeated SARS-CoV-2 vaccination and peptide stimulation in vitro (related to Figure 8)

**Page 17-18:** Supplemental Table 1. Cross-reactive genes (related to Figure 4)

**Page 19:** Supplemental Table 2. Cell cycle phase genes (related to Supplemental Figure 7a)

Supplemental Figure 1

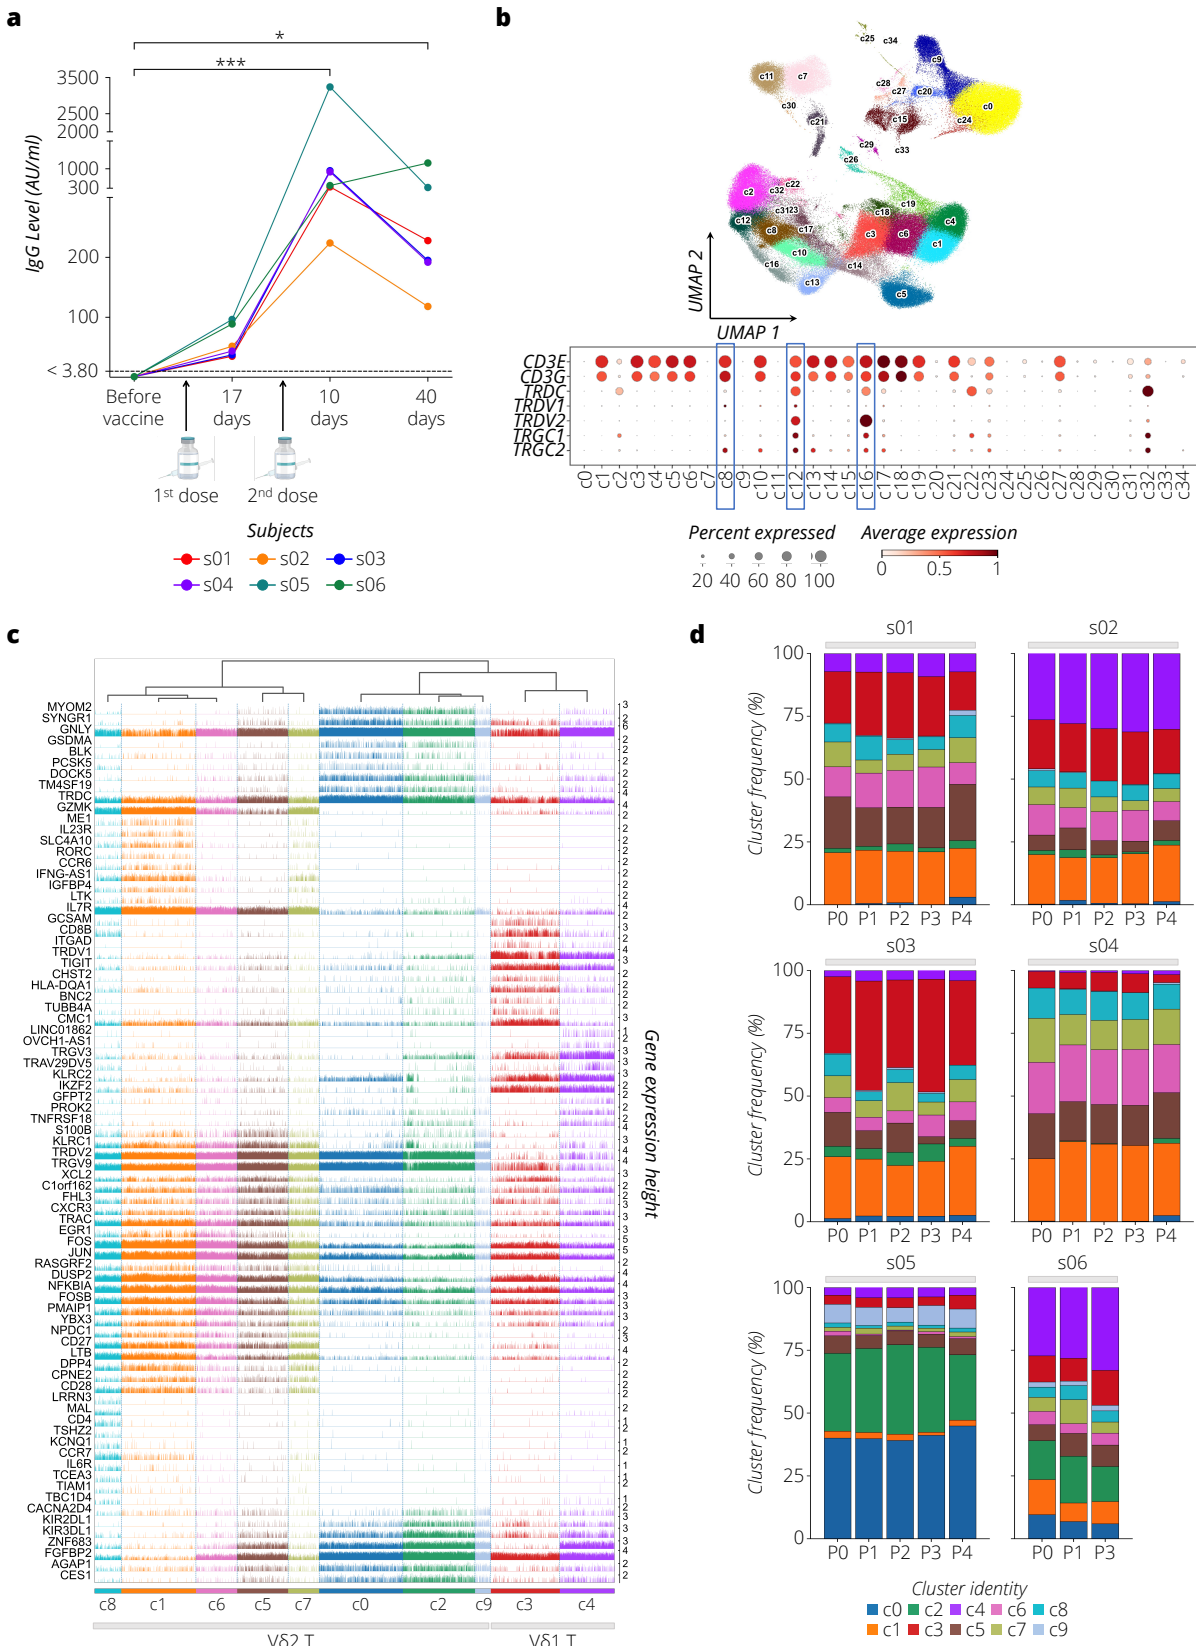

## **Supplemental Figure 1. Single cell RNA-seq analysis in SARS-CoV-2 vaccinated subjects**

**(a)** Kinetics of anti-SARS-CoV-2 IgG antibody levels in the cohort of vaccinated subjects (s01-s06) at different time points pre- and post-first and second doses of the mRNA-based *BNT162b2* vaccine. For the statistical analysis, the paired ANOVA Friedman statistical test was used, and statistic values are represented as *P*-values (\*):  $*P < 0.05$  and  $***P < 0.001$ .

**(b)** UMAP visualization of the integrated single-cell transcriptomes of PBMCs (242,765 cells) identified across all time points (P0-P4), subjects (s01-s06) and cell clusters (c0-c34) after QC filtering. Cell clusters enriched in  $\gamma\delta$  T cells (c8, c12, and c16), highlighted in blue boxes, were identified based on the expression of known markers (*CD3E*, *CD3G*, *TRDC*, *TRDV1*, *TRDV2*, *TRGC1*, and *TRGC2*), and re-clustered for further analysis.

**(c)** Characterization of specific  $\gamma\delta$  T cell clusters (c0-c9) obtained after re-clustering. The track plot shows the gene expression height of the top 10 DEGs (rows) for each identified  $\gamma\delta$  T cell cluster.

**(d)** The bar plot shows the normalized frequency (%) of  $\gamma\delta$  T cell cluster (c0-c9) distribution across all analyzed time points (P0-P4) for each subject (s01-s06). The cell cluster's frequencies were calculated by normalizing against all subject-related cell counts at each time point.

**Supplemental Figure 2**

**a**

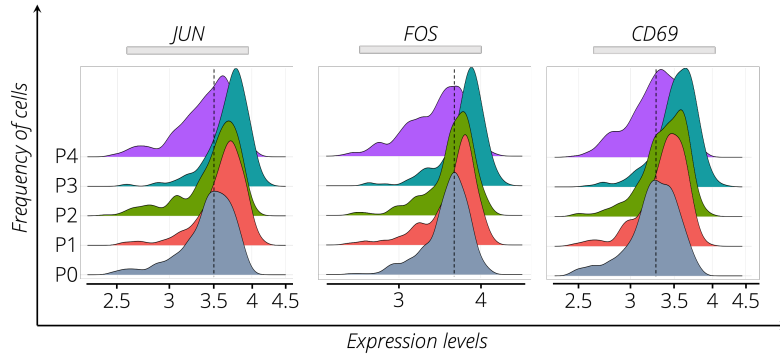

**b**

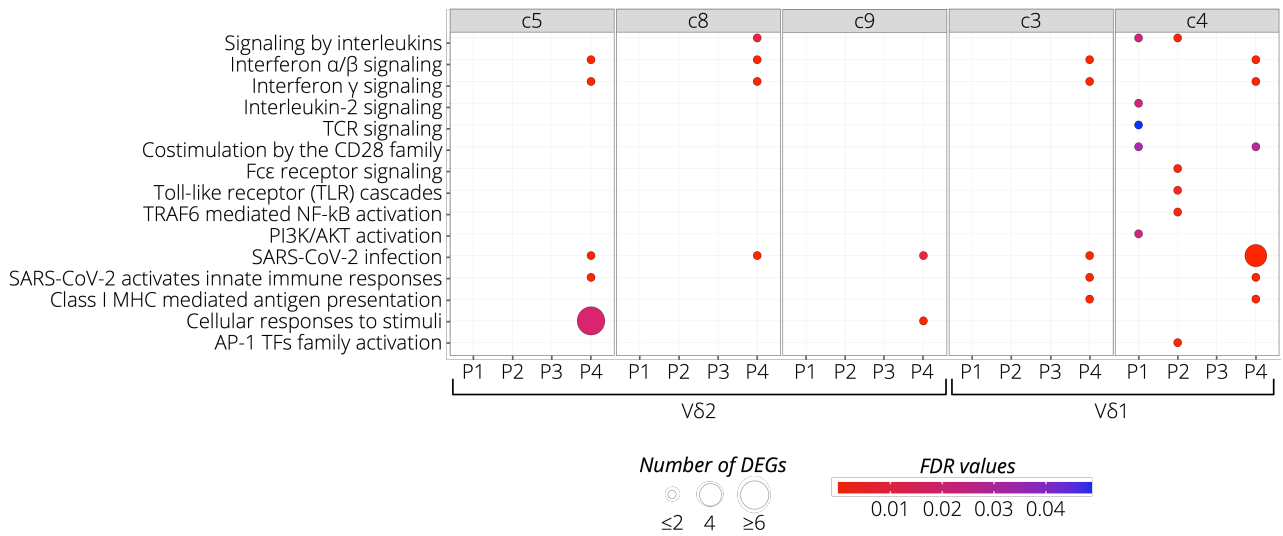

**Supplemental Figure 2. Identity of the specific  $\gamma\delta$  T cell cluster activation following SARS-CoV-2 vaccination**

**(a)** The ridge plots show the expression levels (x-axis, log-UMI) and the frequency of cells (y-axis) for each time point (P0-P4) of three DEGs (*JUN*, *FOS*, and *CD69*) detected in cluster c1 at P1 vs P0. Null gene expression cells were excluded from the analysis. The dotted line highlights the changes in gene expression levels across the different time points (P0-P4) relative to the peak gene expression at the baseline.

**(b)** The dot plot shows a selection of significantly enriched pathways with FDR values <0.05, identified among DEGs at each time point (P0-P4) for V $\delta$ 2 T cell clusters (c5, c8, and c9) and for V $\delta$ 1 T cell clusters (c3 and c4) using the *Reactome* pathway browser. Dots are colored based on FDR values and sized according to the number of DEGs enriched in each pathway.

Supplemental Figure 3

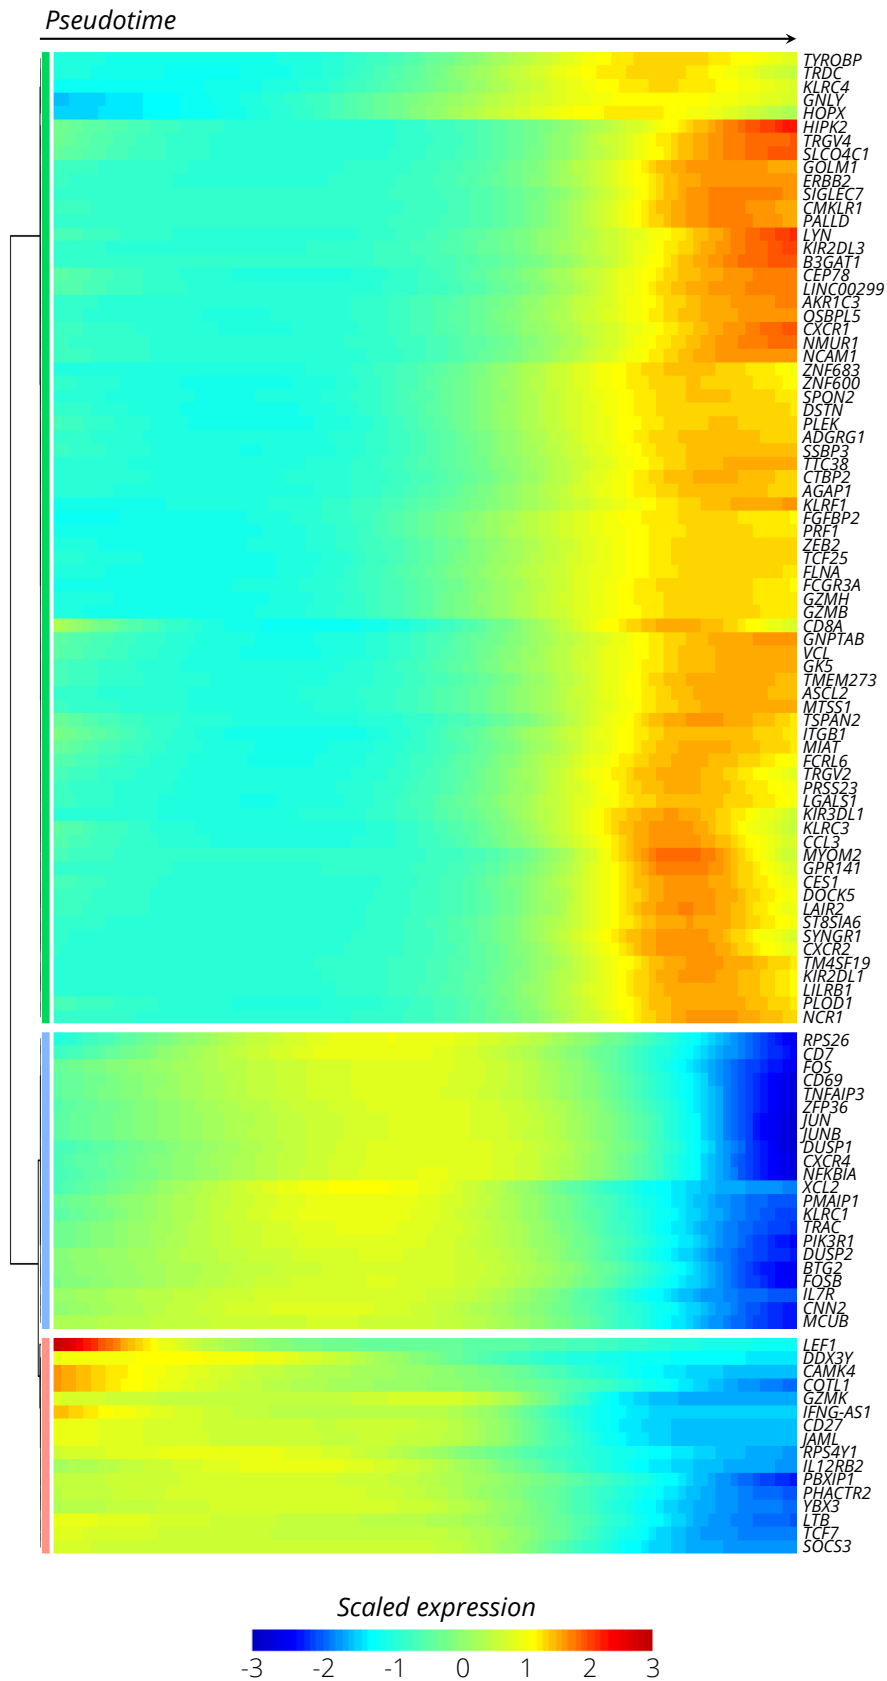

**Supplemental Figure 3. SARS-CoV-2 vaccination shapes the effectorness of V $\delta$ 2 T cells**

Heatmap displaying the top selected 50 genes ( $q$  value  $<0.01$ ) variable along the V $\delta$ 2 T cell pseudotime trajectory calculated for all time points (P0-P4). The x-axis represents cells ordered by pseudotime (from left to right), and different colors indicate the scaled (Z-scored) expression of each gene in each cell.

Supplemental Figure 4

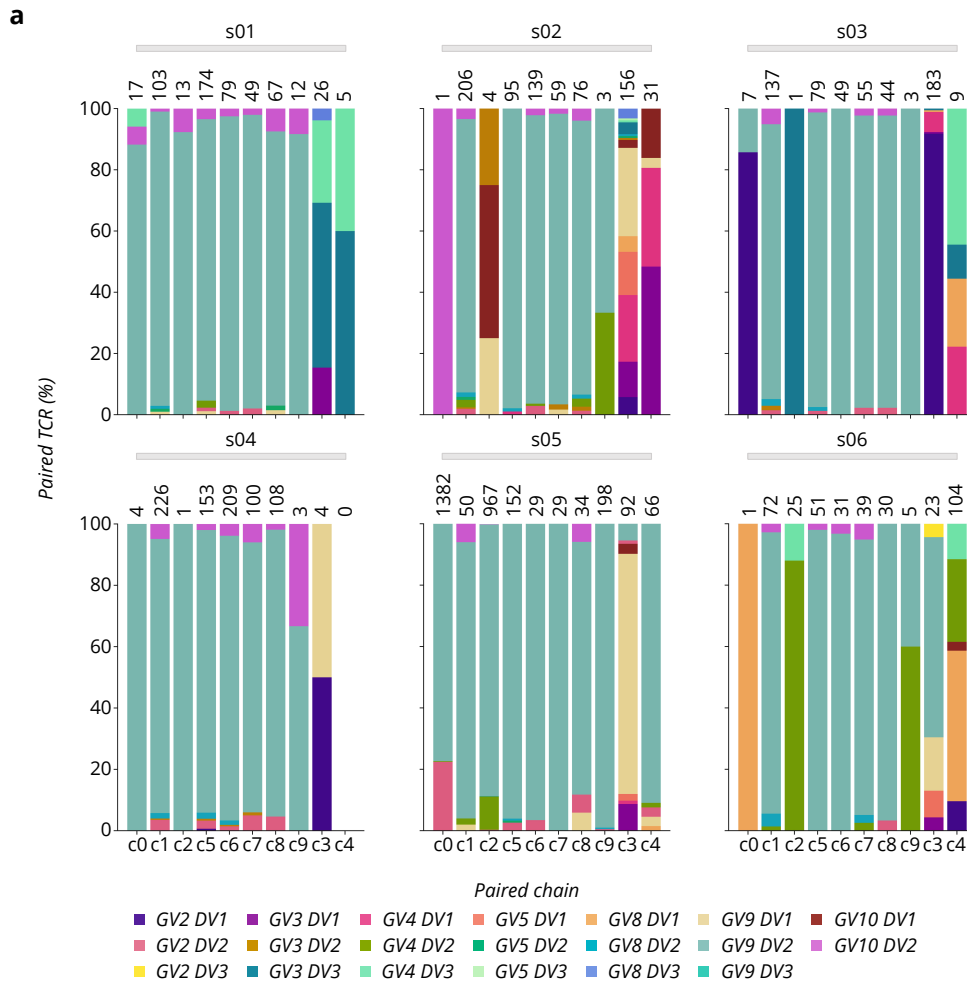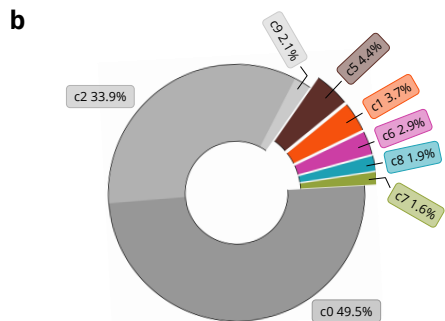



**Supplemental Figure 4. Specific cluster profiling of  $\gamma\delta$  TCR repertoire**

**(a)** The bar plots show the frequency (%) of all paired GV/DV chains in each cluster (c0-c9) per subject (s01-s04). The total numbers of paired  $\gamma\delta$  TCR chains are indicated at the top of each bar.

**(b)** The pie chart shows the frequency (%) of GV/DV paired highly expanded clones ( $\geq 50$  cells) within each cluster of V $\delta$ 2 T cells (c0-c2, c5-c9).

## Supplemental Figure 5

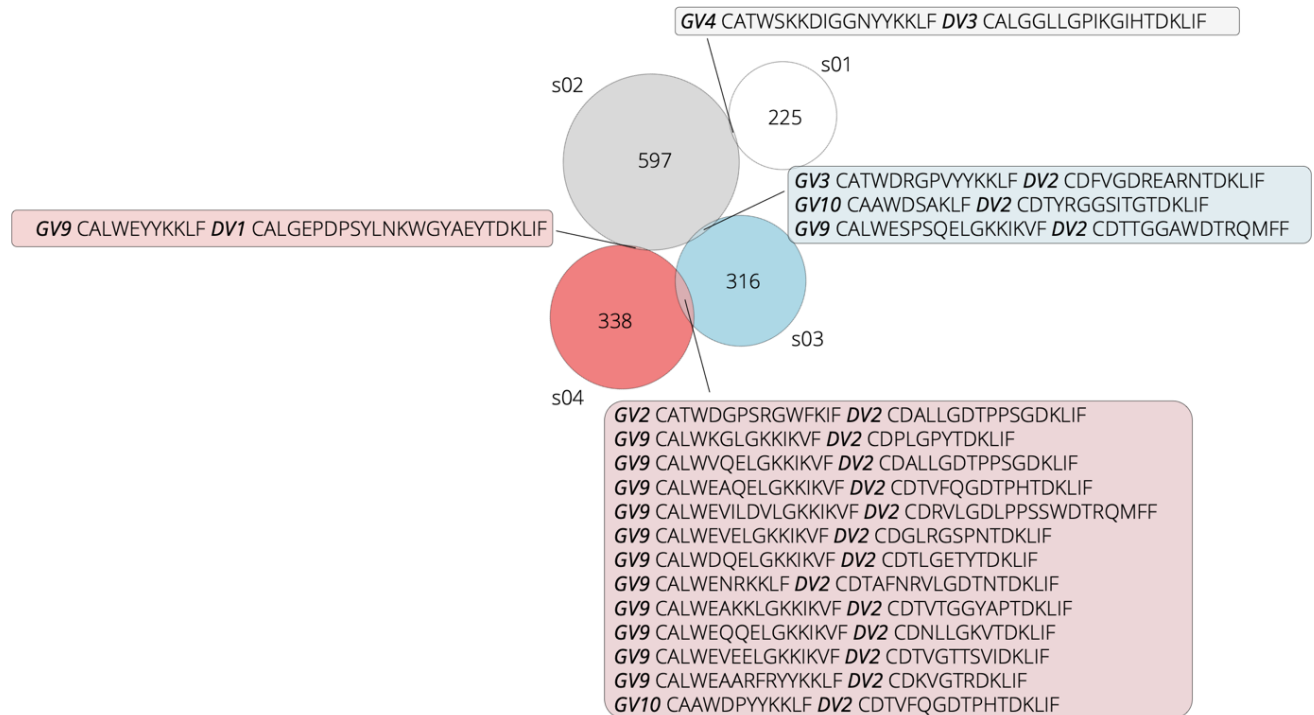

### Supplemental Figure 5. Analysis of the public $\gamma\delta$ TCR clonotypes

The Venn diagram evidences the number of paired CD3 $\gamma$  and CD3 $\delta$   $\gamma\delta$  TCR clonotypes that overlap among different subjects (s01-s04).

Supplemental Figure 6

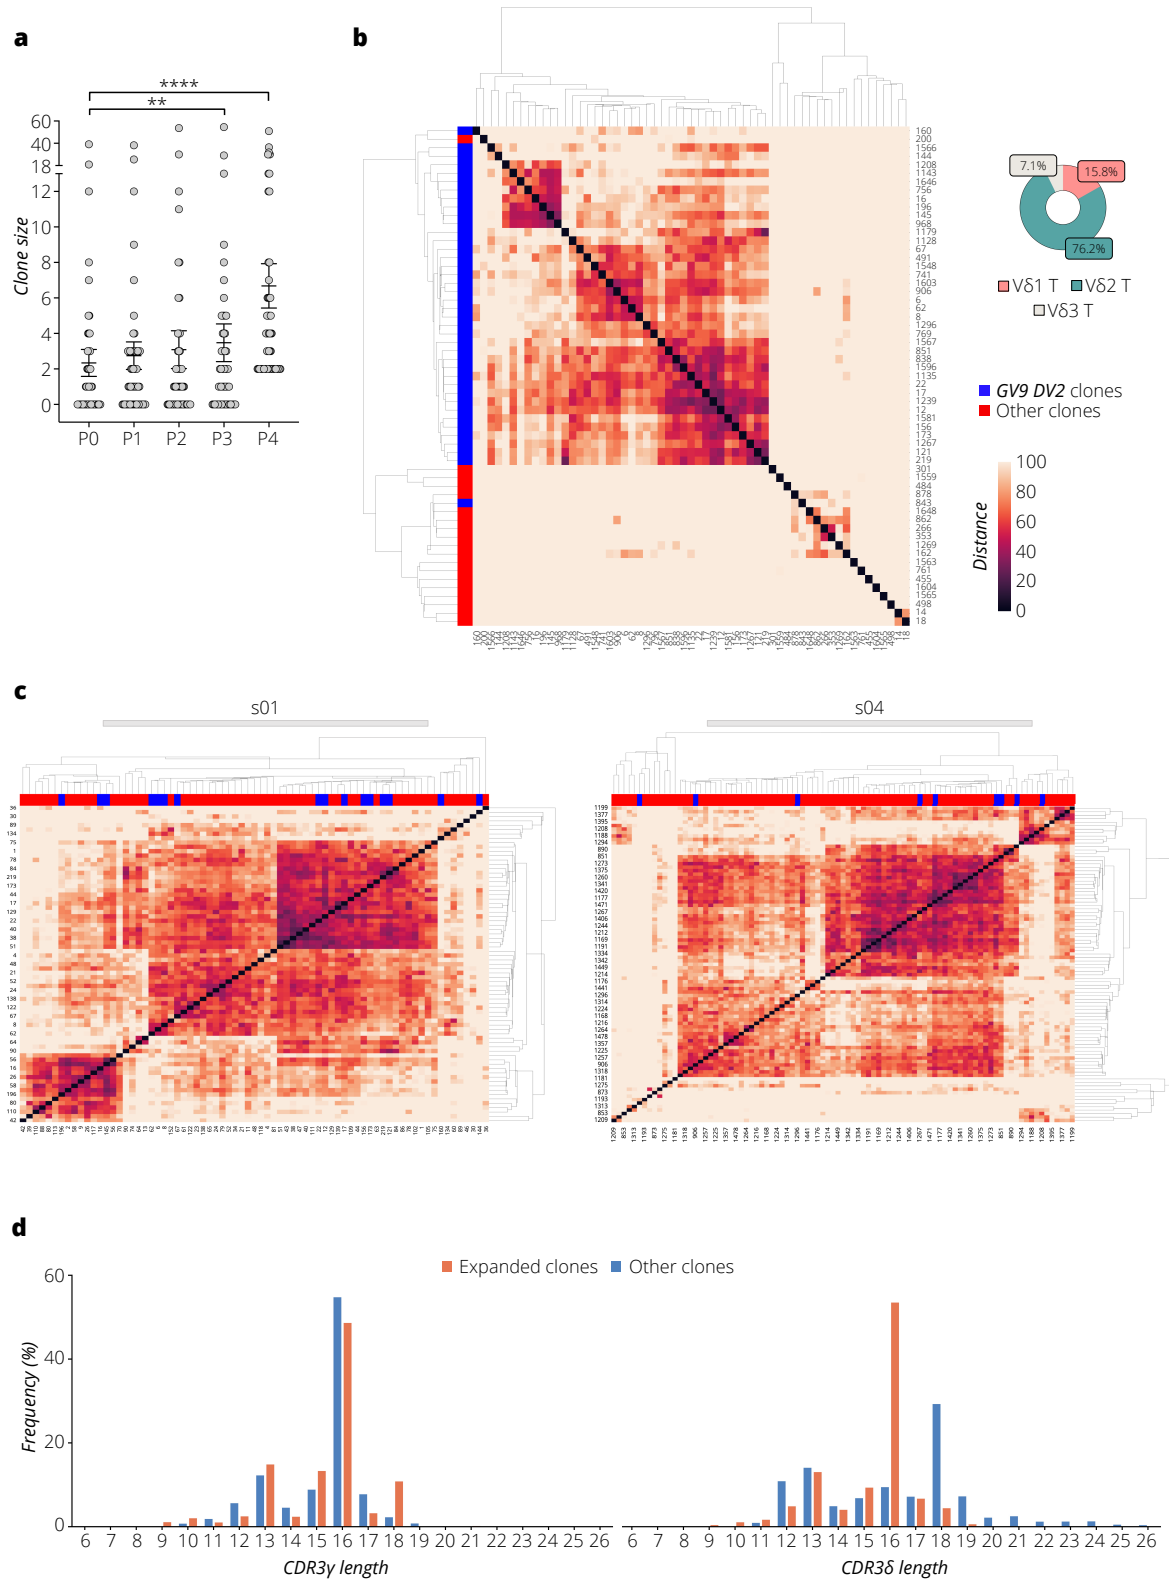

## **Supplemental Figure 6. Analysis of the expanded $\gamma\delta$ TCR clones upon SARS-CoV-2 vaccination**

**(a)** Distribution of  $\gamma\delta$ -TCR clones with a cell clone size  $\geq 2$  across all time points (P0-P4) following vaccination. For the statistical analysis, the unpaired nonparametric ANOVA test with Dunn's distribution was used, evaluating all time points (P1-P4) compared to baseline (P0). Statistic values are represented as *P*-values (\*): \*\**P* < 0.01 and \*\*\*\**P* < 0.0001.

**(b)** The hierarchically-clustered heatmap shows the CD3R $\gamma$  and CD3R $\delta$  amino acids sequence distance for expanded  $\gamma\delta$  TCR clones. Dark red indicates high similarity (low distance), while rose indicates low similarity (high distance). GV9DV2 clones are highlighted in blue, while other clones are in red. The pie chart shows the frequency of DV chains of expanded paired clones.

**(c)** The example of hierarchically-clustered heatmap shows the CD3R $\gamma$  and CD3R $\delta$  amino acids sequence distance for GV9DV2 clones for subjects s01 and s04. Dark red indicates high similarity (low distance) while rose indicates low similarity (high distance). The GV9DV2 expanded clones are highlighted in blue, while the total GV9DV2 clones are in red.

**(d)** The length percentage frequency distribution (%) of CDR3 $\gamma$  (top) and CDR3 $\delta$  (bottom) was calculated in the expanded paired  $\gamma\delta$  TCR clones following vaccination (in red), and in all other identified clones (in blue).

Supplemental Figure 7

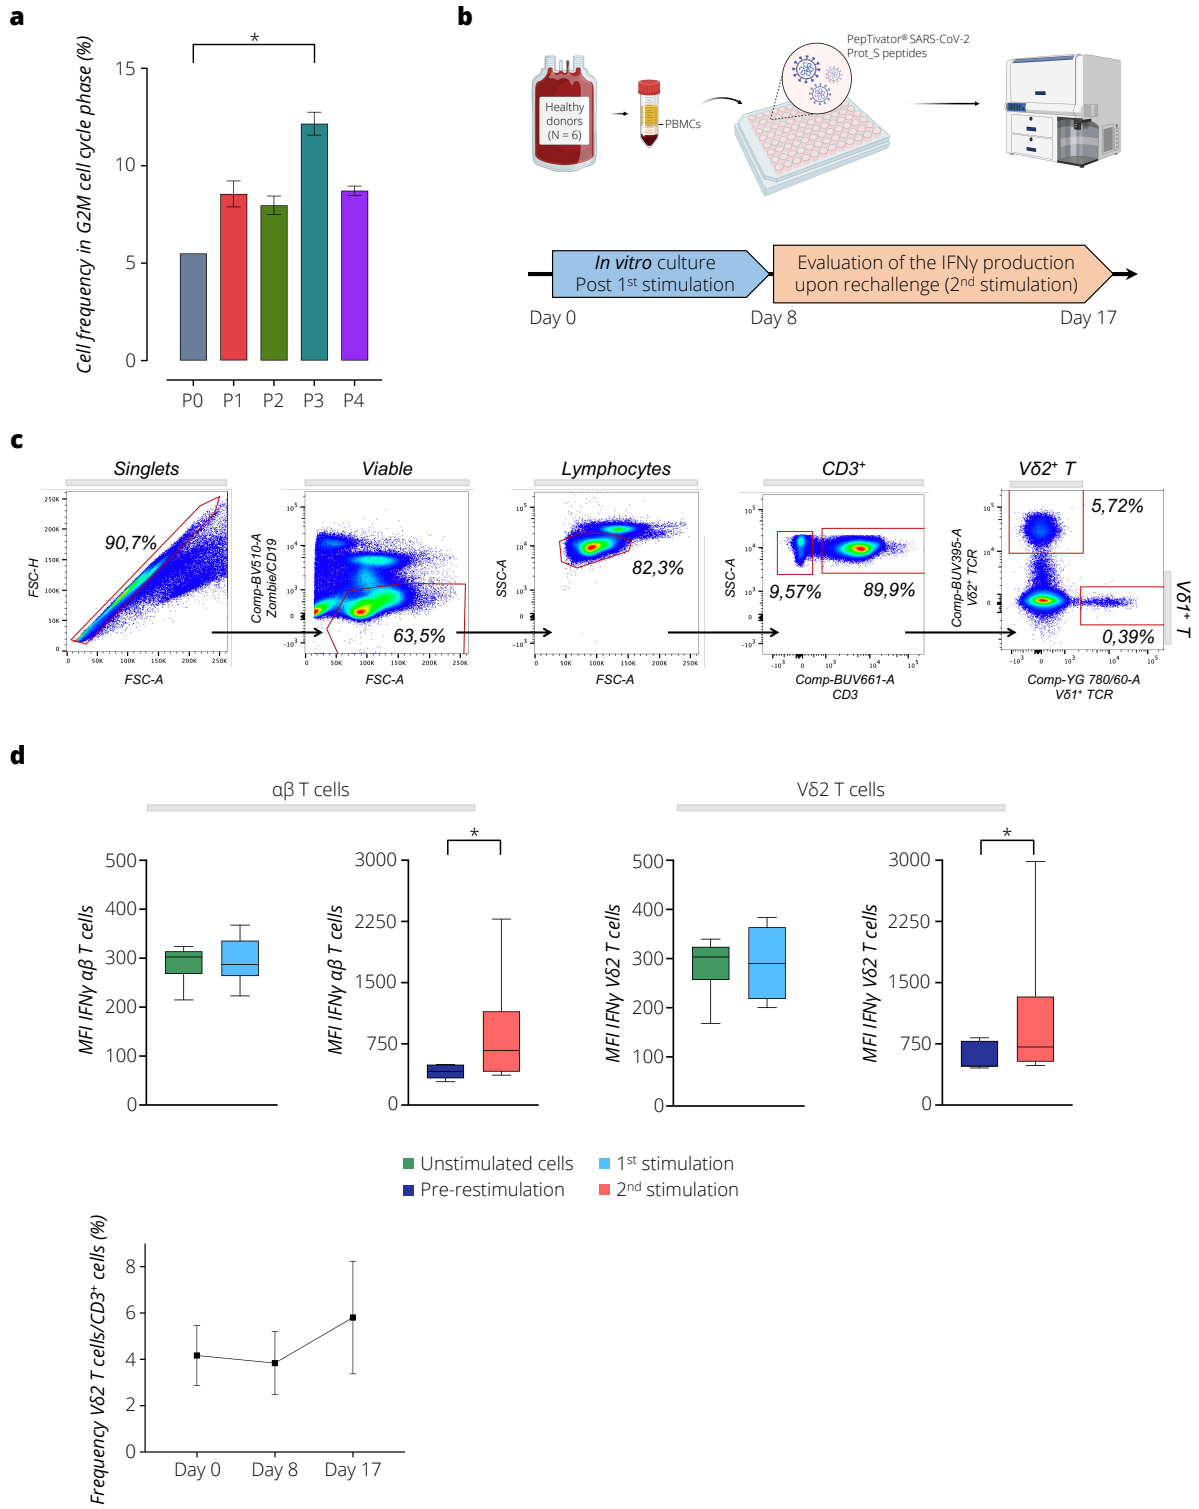

**Supplemental Figure 7. Increased effector response of V $\delta$ 2 T cells following repeated SARS-CoV-2 vaccination and peptide stimulation *in vitro***

**(a)** The bar plot shows the percentage (%) of expanded  $\gamma\delta$  TCR clones in the G2M cell cycle phase. For the statistical analysis, the standard error of the mean (SEM) was calculated according to the absolute cell count, and the unpaired parametric *t*-test was used between each time point (P1-P4) compared to the baseline (P0). Statistic values are represented as *P*-values (\*): \**P* < 0.05.

**(b)** Schematic overview of the *in vitro* experimental design.

**(c)** Representative flow cytometry dot plots showing the gating strategy used to distinguish the two subsets of  $\gamma\delta$  T cells, V $\delta$ 1 and V $\delta$ 2, among all the viable peripheral blood CD3<sup>+</sup> lymphocytes.

**(d)** Functional analyses of V $\delta$ 2 and  $\alpha\beta$  T cell response upon SARS-CoV-2 Prot\_S peptides stimulation showing the IFN $\gamma$  expression (MFI values) after the first and the second stimulation with peptides compared to their respective controls. The frequency of V $\delta$ 2 T cells among the CD3<sup>+</sup> T cells is reported at each of the three time points analyzed in the experiment. For the statistical analysis, the paired nonparametric *t*-test was used. Statistic values are represented as *P*-values (\*): \**P* < 0.05.

Supplemental Table 1

| No  | Gene         | Effectorness<br><i>adj.p</i> < 0.05 | Time<br><i>adj.p</i> < 0.05 | Interaction<br><i>adj.p</i> < 0.05 |
|-----|--------------|-------------------------------------|-----------------------------|------------------------------------|
| 1   | DUSP1        | 0E+00                               | 4E-25                       | 8E-93                              |
| 2   | JUN          | 0E+00                               | 2E-23                       | 1E-83                              |
| 3   | NFKBIA       | 6E-292                              | 6E-09                       | 2E-80                              |
| 4   | PPP1R15A     | 6E-149                              | 3E-24                       | 3E-60                              |
| 5   | FOS          | 0E+00                               | 3E-40                       | 7E-59                              |
| 6   | JUNB         | 0E+00                               | 2E-39                       | 1E-54                              |
| 7   | GIMAP7       | 4E-21                               | 6E-33                       | 3E-53                              |
| 8   | CXCR4        | 0E+00                               | 8E-90                       | 1E-52                              |
| 9   | CD69         | 0E+00                               | 2E-09                       | 5E-52                              |
| 10  | TNFAIP3      | 0E+00                               | 4E-22                       | 2E-45                              |
| 11  | ZFP36        | 0E+00                               | 3E-78                       | 9E-42                              |
| 12  | NR4A2        | 3E-121                              | 9E-51                       | 1E-40                              |
| 13  | CX3CR1       | 0E+00                               | 2E-36                       | 7E-38                              |
| 14  | GIMAP5       | 7E-19                               | 3E-09                       | 2E-34                              |
| 15  | BTG2         | 2E-199                              | 1E-36                       | 8E-31                              |
| 16  | PIK3R1       | 0E+00                               | 9E-65                       | 8E-31                              |
| 17  | RBM38        | 5E-41                               | 6E-62                       | 1E-30                              |
| 18  | TSC22D3      | 3E-85                               | 4E-07                       | 3E-29                              |
| 19  | FOSB         | 2E-216                              | 7E-12                       | 5E-29                              |
| 20  | GADD45B      | 2E-40                               | 2E-35                       | 8E-28                              |
| 21  | AC020916.1   | 4E-28                               | 4E-03                       | 5E-27                              |
| 22  | CREM         | 2E-09                               | 1E-48                       | 9E-26                              |
| 23  | KLIF6        | 3E-02                               | 7E-60                       | 1E-24                              |
| 24  | EGR1         | 5E-66                               | 3E-60                       | 2E-23                              |
| 25  | ZNF331       | 7E-44                               | 5E-58                       | 9E-20                              |
| 26  | MAP3K8       | 6E-43                               | 3E-46                       | 4E-19                              |
| 27  | JUND         | 1E-37                               | 2E-04                       | 4E-19                              |
| 28  | IER2         | 5E-64                               | 3E-28                       | 2E-18                              |
| 29  | S100A11      | 9E-11                               | 7E-09                       | 8E-18                              |
| 30  | PLEK         | 7E-173                              | 2E-07                       | 1E-17                              |
| 31  | PDE4D        | 1E-38                               | 2E-24                       | 4E-17                              |
| 32  | MAFF         | 6E-38                               | 1E-30                       | 2E-16                              |
| 33  | DUSP2        | 0E+00                               | 6E-97                       | 2E-16                              |
| 34  | FOSL2        | 4E-11                               | 3E-27                       | 3E-16                              |
| 35  | TENT5C       | 6E-146                              | 5E-37                       | 7E-16                              |
| 36  | YPEL5        | 9E-30                               | 3E-21                       | 8E-16                              |
| 37  | SERTAD1      | 3E-23                               | 2E-27                       | 9E-16                              |
| 38  | PMAIP1       | 1E-155                              | 2E-14                       | 9E-16                              |
| 39  | NFKBIZ       | 1E-120                              | 1E-17                       | 3E-15                              |
| 40  | DNAB1        | 1E-160                              | 6E-30                       | 6E-15                              |
| 41  | PER1         | 2E-26                               | 1E-13                       | 7E-15                              |
| 42  | IER5         | 1E-79                               | 3E-20                       | 7E-15                              |
| 43  | PTPN6        | 4E-02                               | 4E-02                       | 1E-14                              |
| 44  | SPON2        | 0E+00                               | 6E-08                       | 1E-13                              |
| 45  | PRF1         | 0E+00                               | 4E-28                       | 2E-12                              |
| 46  | DUSP5        | 2E-52                               | 8E-16                       | 2E-12                              |
| 47  | AC245014.3   | 3E-81                               | 2E-09                       | 1E-11                              |
| 48  | ZFP36L1      | 1E-10                               | 9E-03                       | 1E-11                              |
| 49  | RPS4Y1       | 0E+00                               | 1E-34                       | 1E-11                              |
| 50  | AC044849.1   | 6E-51                               | 2E-05                       | 1E-11                              |
| 51  | IFNG         | 2E-59                               | 2E-08                       | 1E-11                              |
| 52  | ACTB         | 3E-90                               | 5E-03                       | 2E-11                              |
| 53  | SNX18        | 9E-29                               | 6E-03                       | 2E-11                              |
| 54  | PPBP         | 5E-02                               | 7E-31                       | 9E-11                              |
| 55  | METRNL       | 3E-10                               | 4E-17                       | 9E-11                              |
| 56  | BCL3         | 6E-12                               | 3E-13                       | 1E-10                              |
| 57  | LINC01871    | 3E-32                               | 3E-03                       | 1E-10                              |
| 58  | CISH         | 9E-14                               | 5E-10                       | 1E-10                              |
| 59  | PIM1         | 2E-03                               | 2E-14                       | 4E-10                              |
| 60  | PLEKHF1      | 3E-94                               | 6E-03                       | 1E-09                              |
| 61  | YBX3         | 4E-160                              | 4E-07                       | 2E-09                              |
| 62  | NFKB1        | 8E-84                               | 2E-21                       | 2E-09                              |
| 63  | SLFN5        | 1E-03                               | 1E-12                       | 2E-09                              |
| 64  | DYNLL1       | 4E-35                               | 3E-04                       | 2E-09                              |
| 65  | MYADM        | 1E-42                               | 9E-25                       | 2E-09                              |
| 66  | CSRNP1       | 1E-78                               | 8E-12                       | 2E-09                              |
| 67  | MCL1         | 1E-55                               | 3E-11                       | 4E-09                              |
| 68  | HOPX         | 2E-178                              | 8E-03                       | 4E-09                              |
| 69  | HOKK2        | 5E-94                               | 5E-10                       | 4E-09                              |
| 70  | KIAA2013     | 3E-31                               | 9E-08                       | 5E-09                              |
| 71  | ZC3H12A      | 2E-13                               | 6E-14                       | 9E-09                              |
| 72  | AC253572.2   | 6E-92                               | 6E-04                       | 1E-08                              |
| 73  | FCGR3A       | 0E+00                               | 2E-07                       | 2E-08                              |
| 74  | TUBA1A       | 6E-11                               | 8E-09                       | 2E-08                              |
| 75  | TUBB4B       | 3E-06                               | 2E-09                       | 3E-08                              |
| 76  | S100A4       | 0E+00                               | 2E-11                       | 3E-08                              |
| 77  | IRF4         | 1E-29                               | 2E-09                       | 3E-08                              |
| 78  | TSPYL2       | 5E-77                               | 3E-11                       | 7E-08                              |
| 79  | SOC3         | 3E-161                              | 3E-14                       | 2E-07                              |
| 80  | EML4         | 8E-166                              | 6E-12                       | 2E-07                              |
| 81  | SNHG3        | 8E-08                               | 2E-04                       | 3E-07                              |
| 82  | STARD3NL     | 7E-34                               | 6E-04                       | 3E-07                              |
| 83  | EPB41L4A-AS1 | 2E-09                               | 3E-03                       | 3E-07                              |
| 84  | SH2D3C       | 1E-12                               | 1E-05                       | 3E-07                              |
| 85  | NR4A3        | 6E-47                               | 2E-14                       | 3E-07                              |
| 86  | IL7R         | 0E+00                               | 8E-18                       | 4E-07                              |
| 87  | KLRC2        | 1E-60                               | 2E-07                       | 6E-07                              |
| 88  | EEF1A1       | 0E+00                               | 3E-04                       | 6E-07                              |
| 89  | WHRN         | 6E-18                               | 1E-09                       | 9E-07                              |
| 90  | RGS2         | 2E-21                               | 2E-03                       | 9E-07                              |
| 91  | UBE2S        | 1E-39                               | 1E-06                       | 1E-06                              |
| 92  | AKR1C3       | 2E-186                              | 3E-02                       | 2E-06                              |
| 93  | ARL4A        | 5E-56                               | 9E-05                       | 4E-06                              |
| 94  | IER5L        | 7E-15                               | 2E-14                       | 4E-06                              |
| 95  | CXCR3        | 4E-37                               | 1E-06                       | 4E-06                              |
| 96  | LMNA         | 3E-10                               | 3E-07                       | 5E-06                              |
| 97  | SOC3         | 5E-44                               | 3E-08                       | 6E-06                              |
| 98  | TAGAP        | 3E-03                               | 1E-10                       | 7E-06                              |
| 99  | DDIT4        | 1E-17                               | 6E-40                       | 1E-05                              |
| 100 | BHLHE40      | 5E-43                               | 1E-05                       | 1E-05                              |
| 101 | CAMK4        | 0E+00                               | 1E-04                       | 2E-05                              |
| 102 | SPN          | 5E-87                               | 2E-05                       | 3E-05                              |
| 103 | PTGER2       | 7E-31                               | 2E-07                       | 3E-05                              |
| 104 | UCP2         | 2E-15                               | 4E-06                       | 4E-05                              |
| 105 | HIST1H3D     | 1E-26                               | 3E-04                       | 7E-05                              |
| 106 | RPSA         | 0E+00                               | 5E-04                       | 7E-05                              |
| 107 | SYTL3        | 9E-04                               | 2E-18                       | 8E-05                              |
| 108 | AC087623.2   | 2E-11                               | 4E-06                       | 8E-05                              |
| 109 | HIST1H1E     | 2E-04                               | 2E-15                       | 8E-05                              |
| 110 | ST6GAL1      | 3E-02                               | 1E-04                       | 1E-04                              |
| 111 | GPR65        | 2E-04                               | 3E-02                       | 1E-04                              |
| 112 | DDIT3        | 2E-02                               | 6E-04                       | 1E-04                              |
| 113 | ZFP36L2      | 0E+00                               | 2E-46                       | 2E-04                              |
| 114 | NFATC2       | 3E-39                               | 2E-03                       | 2E-04                              |
| 115 | RGCC         | 2E-88                               | 3E-16                       | 2E-04                              |
| 116 | CDS5         | 1E-67                               | 7E-09                       | 3E-04                              |
| 117 | SMAD7        | 1E-08                               | 1E-02                       | 3E-04                              |
| 118 | AC012615.1   | 1E-08                               | 3E-05                       | 3E-04                              |
| 119 | ICAM2        | 4E-12                               | 1E-02                       | 3E-04                              |
| 120 | SKIL         | 1E-18                               | 3E-02                       | 3E-04                              |
| 121 | TNF          | 4E-05                               | 5E-07                       | 4E-04                              |
| 122 | CD83         | 3E-24                               | 4E-09                       | 4E-04                              |
| 123 | IFRD1        | 1E-42                               | 4E-08                       | 5E-04                              |
| 124 | IFNG-AS1     | 6E-130                              | 3E-06                       | 5E-04                              |
| 125 | FASLG        | 2E-16                               | 6E-04                       | 6E-04                              |
| 126 | ATF3         | 8E-14                               | 2E-02                       | 7E-04                              |
| 127 | HERPUD1      | 6E-10                               | 2E-14                       | 7E-04                              |
| 128 | DDX3Y        | 1E-127                              | 1E-07                       | 8E-04                              |
| 129 | GPR183       | 5E-114                              | 2E-05                       | 9E-04                              |
| 130 | PHLDA1       | 5E-10                               | 1E-02                       | 1E-03                              |
| 131 | HSPA1A       | 3E-13                               | 9E-05                       | 1E-03                              |
| 132 | S100A9       | 4E-03                               | 7E-07                       | 1E-03                              |
| 133 | LPAR6        | 3E-03                               | 8E-06                       | 2E-03                              |
| 134 | KIR2DL3      | 2E-106                              | 6E-04                       | 2E-03                              |
| 135 | PRDM1        | 1E-32                               | 2E-09                       | 2E-03                              |
| 136 | TNFRSF1A     | 5E-13                               | 4E-04                       | 2E-03                              |
| 137 | TRAC         | 0E+00                               | 3E-13                       | 2E-03                              |
| 138 | ODC1         | 9E-10                               | 1E-02                       | 2E-03                              |
| 139 | CCDC59       | 1E-08                               | 4E-05                       | 2E-03                              |
| 140 | PDE3B        | 3E-80                               | 6E-06                       | 2E-03                              |
| 141 | H2AFX        | 3E-11                               | 4E-07                       | 2E-03                              |
| 142 | SLC1A5       | 2E-14                               | 4E-02                       | 3E-03                              |
| 143 | TCF7         | 0E+00                               | 6E-04                       | 3E-03                              |
| 144 | SLAMF6       | 1E-08                               | 5E-02                       | 3E-03                              |
| 145 | LIMK1        | 5E-04                               | 4E-03                       | 4E-03                              |
| 146 | RPL8         | 0E+00                               | 8E-04                       | 5E-03                              |
| 147 | CEMP2        | 2E-02                               | 1E-07                       | 6E-03                              |
| 148 | PUDP         | 4E-02                               | 3E-02                       | 6E-03                              |
| 149 | ITPRIP       | 4E-12                               | 2E-04                       | 6E-03                              |
| 150 | RPLP1        | 0E+00                               | 2E-14                       | 6E-03                              |
| 151 | CD320        | 1E-88                               | 2E-03                       | 9E-03                              |
| 152 | GABARAPL1    | 6E-12                               | 9E-05                       | 1E-02                              |
| 153 | PRSS23       | 0E+00                               | 5E-05                       | 1E-02                              |
| 154 | HBB          | 2E-04                               | 9E-10                       | 1E-02                              |
| 155 | CCDC88C      | 5E-54                               | 6E-10                       | 1E-02                              |
| 156 | AP002387.2   | 3E-04                               | 5E-03                       | 1E-02                              |
| 157 | ARID5A       | 5E-06                               | 2E-04                       | 1E-02                              |
| 158 | POU2F1       | 8E-03                               | 5E-04                       | 1E-02                              |
| 159 | GADD45G      | 1E-07                               | 7E-05                       | 1E-02                              |
| 160 | TCF25        | 2E-163                              | 7E-03                       | 2E-02                              |
| 161 | KLRC4        | 3E-207                              | 6E-03                       | 2E-02                              |
| 162 | CD55         | 7E-140                              | 2E-04                       | 2E-02                              |
| 163 | AC025164.1   | 2E-23                               | 1E-02                       | 2E-02                              |
| 164 | AC004865.2   | 2E-35                               | 5E-05                       | 2E-02                              |
| 165 | PTGER4       | 1E-26                               | 9E-09                       | 2E-02                              |
| 166 | HIST1H4C     | 2E-20                               | 2E-03                       | 2E-02                              |
| 167 | AREG         | 9E-30                               | 3E-06                       | 2E-02                              |
| 168 | ID1          | 8E-13                               | 3E-12                       | 2E-02                              |
| 169 | TENT4B       | 2E-06                               | 5E-06                       | 3E-02                              |
| 170 | AC004687.1   | 7E-15                               | 3E-03                       | 3E-02                              |
| 171 | TNFSF14      | 4E-04                               | 1E-03                       | 3E-02                              |
| 172 | IRS2         | 2E-38                               | 4E-06                       | 3E-02                              |
| 173 | EOMES        | 1E-09                               | 7E-08                       | 3E-02                              |
| 174 | GATA3        | 8E-25                               | 5E-04                       | 3E-02                              |
| 175 | ITGAM        | 3E-107                              | 7E-06                       | 3E-02                              |
| 176 | PLEKHG3      | 9E-44                               | 3E-02                       | 4E-02                              |
| 177 | XCL2         | 4E-120                              | 8E-04                       | 4E-02                              |
| 178 | HDDC2        | 5E-22                               | 4E-02                       | 4E-02                              |
| 179 | PTGDR        | 2E-09                               | 1E-04                       | 5E-02                              |

**Supplemental Table 1. Cross-reactive genes**

This table provides a list of genes whose expression was significantly modulated by effectorness and vaccination acting independently, as well as jointly due to their cross-reactive effect. Gene expression was modeled as a function of effectorness, time, and their interaction using a linear regression with interaction terms. We used ANOVA (two-sided) to test which gene are modulated by effectorness and vaccination acting both independently and jointly. The analysis was restricted to highly variable genes, with the removal of mitochondrial, immunoglobulin, and *TCR* genes. We report the FDR adjusted *P* (*adj.p*)-value for any gene with a value <0.05. Columns correspond to gene name and *adj.p-value* for effectorness, time and effectorness-time interaction effects.



**Supplemental Table 2**

| <b>Cell cycle phase genes</b>                                                                                                                                                                                                                                                                                                                                                                                                                                                                                                                                                                                                                                                |
|------------------------------------------------------------------------------------------------------------------------------------------------------------------------------------------------------------------------------------------------------------------------------------------------------------------------------------------------------------------------------------------------------------------------------------------------------------------------------------------------------------------------------------------------------------------------------------------------------------------------------------------------------------------------------|
| MCM5, PCNA, TYMS, FEN1, MCM2, MCM4, RRM1, UNG, GINS2, MCM6, CDCA7, DTL, PRIM1, UHRF1, MLF1IP, HELLS, RFC2, RPA2, NASP, RAD51AP1, GMNN, WDR76, SLBP, CCNE2, UBR7, POLD3, MSH2, ATAD2, RAD51, RRM2, CDC45, CDC6, EXO1, TIPIN, DSCC1, BLM, CASP8AP2, USP1, CLSPN, POLA1, CHAF1B, BRIP1, E2F8, HMGB2, CDK1, NUSAP1, UBE2C, BIRC5, TPX2, TOP2A, NDC80, CKS2, NUF2, CKS1B, MKI67, TMPO, CENPF, TACC3, FAM64A, SMC4, CCNB2, CKAP2L, CKAP2, AURKB, BUB1, KIF11, ANP32E, TUBB4B, GTSE1, KIF20B, HJURP, CDCA3, HN1, CDC20, TTK, CDC25C, KIF2C, RANGAP1, NCAPD2, DLGAP5, CDCA2, CDCA8, ECT2, KIF23, HMMR, AURKA, PSRC1, ANLN, LBR, CKAP5, CENPE, CTCF, NEK2, G2E3, GAS2L3, CBX5, CENPA. |

**Supplemental Table 2. Cell cycle phase genes**

This table provides the list of marker genes specific to G1M, G2M, and S phases used to calculate cell cycle phase score to expanded  $\gamma\delta$  TCR clones (related to

Supplemental Figure 7a)
